# Supplementary material
Source: MDPI journal article supplement (https://www.mdpi.com/1999-4907/13/9/1507)
Supplement: s1 [file s1 › forests-1886316-supplementary.pdf]

Supplementary Materials

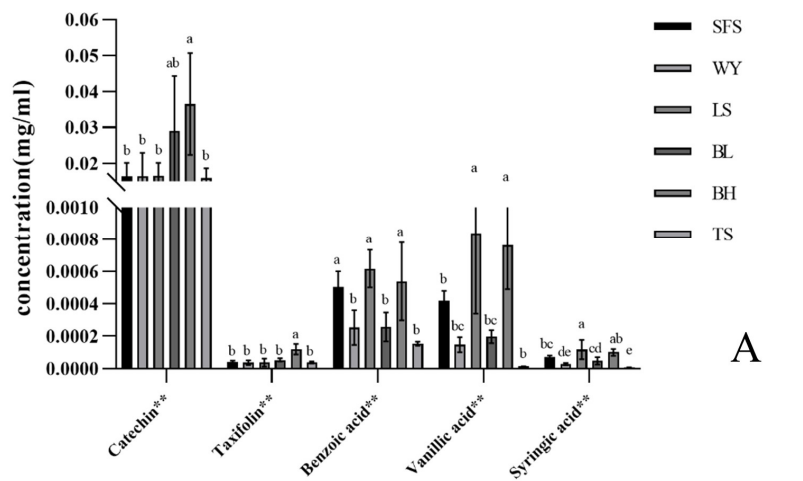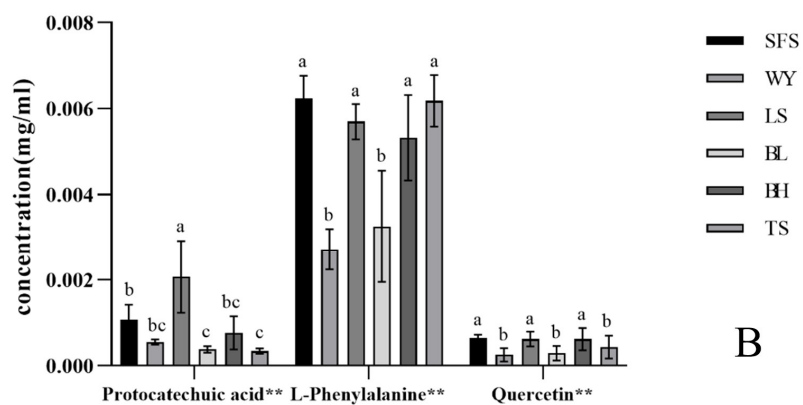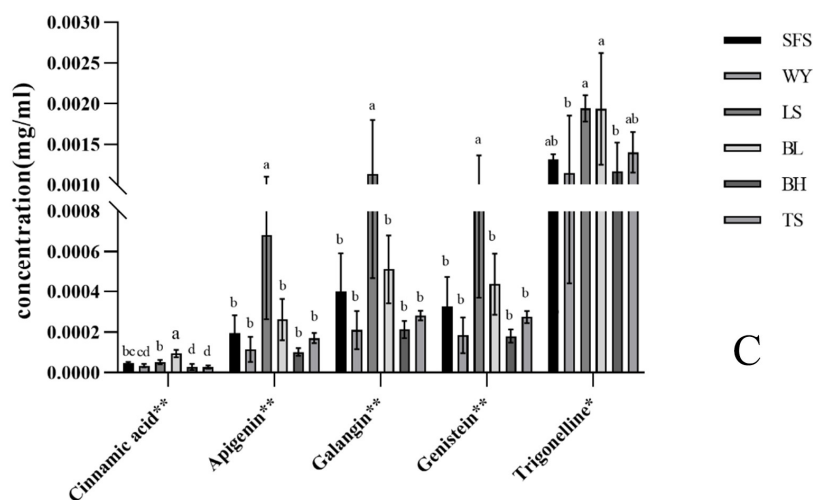

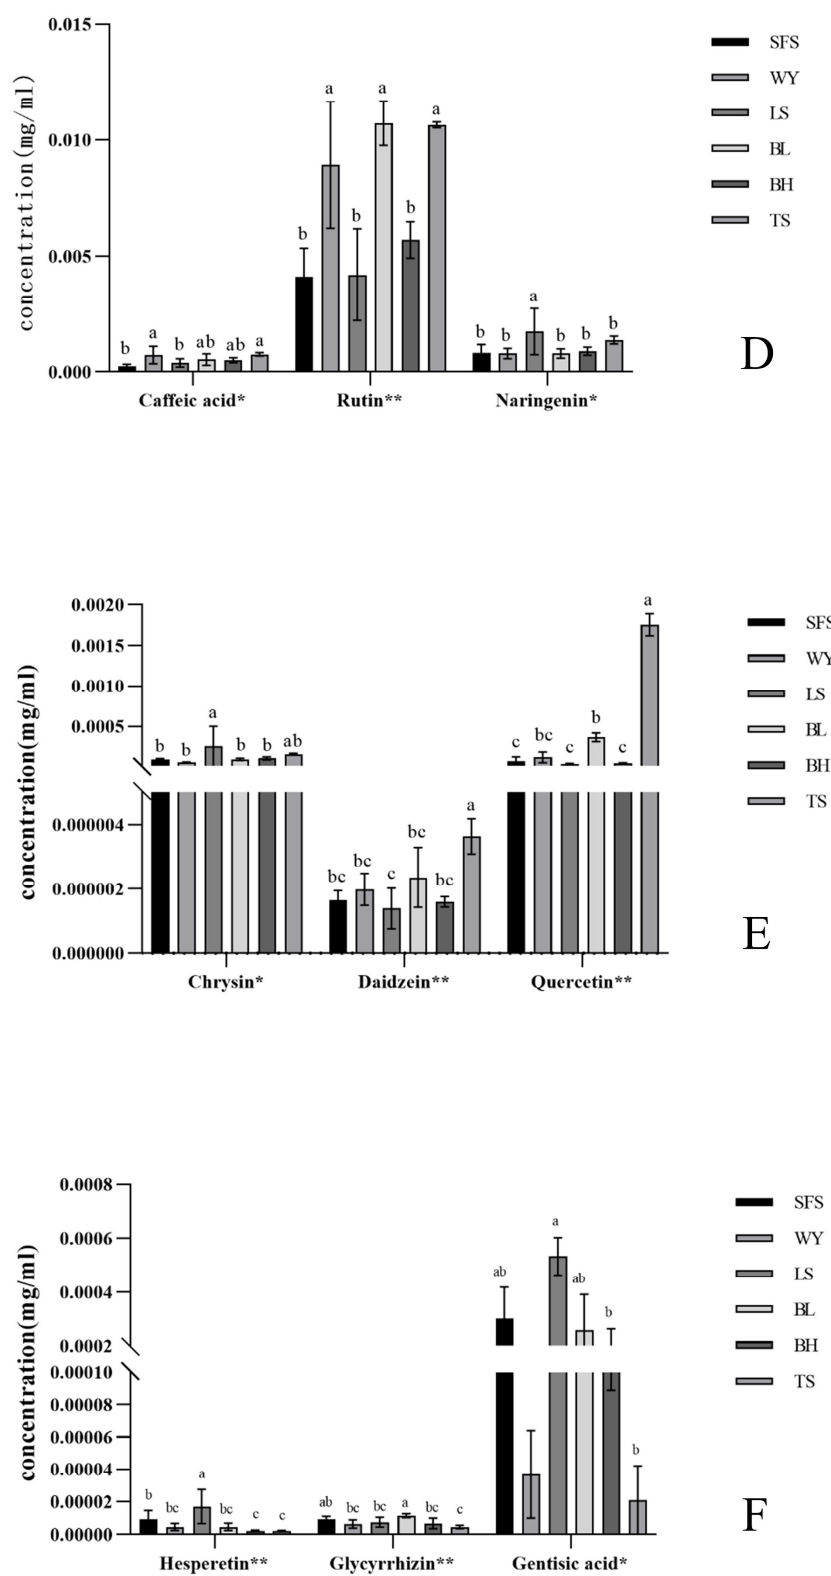

**Figure S1.** Column chart of the contents of 22 significantly different flavonoids(Figure S1 A, B, C, D, E, F) and different letter means compounds with similar contents.

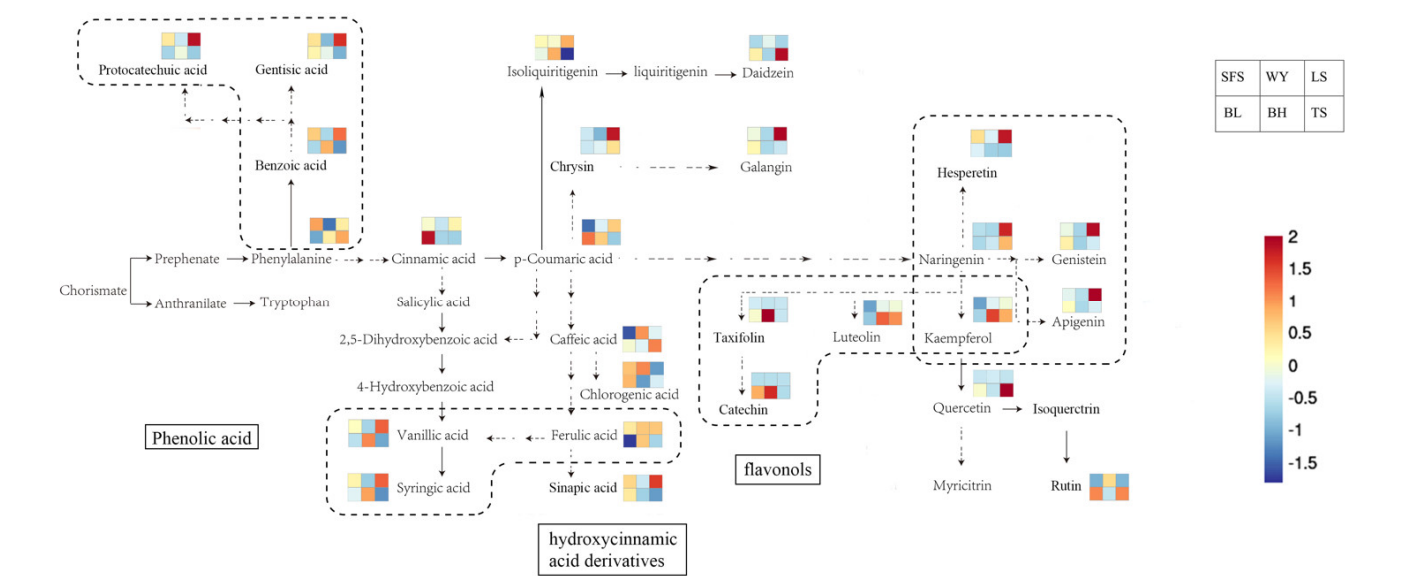

Figure S2. Visualization of primary and secondary metabolite dynamics in biochemical pathway map.

Table S1. Physical indicators at six sampling sites.

| Location | Altitude (m) | Average temperature(°C) | Annual sunshine percentage (%) | Total rainfall (mm) |
|----------|--------------|-------------------------|--------------------------------|---------------------|
| SFS      | 350          | -0.8                    | 60                             | 500                 |
| WY       | 320          | 0.2                     | 50                             | 626.9               |
| LS       | 335          | -0.3                    | 43                             | 676                 |
| BL       | 320          | 3.9                     | 54                             | 550                 |
| BH       | 350          | 5                       | 57                             | 750                 |
| TS       | 300          | 12.9                    | 90                             | 697                 |

a
